# Supplementary material for: A Disintegrin and Metalloprotease‐22 Attenuates Hypertrophic Remodeling in Mice Through Inhibition of the Protein Kinase B Signaling Pathway
Source: PubMed Central journal article supplement — J Am Heart Assoc. 2018 Jan 22;7(2):e005696. doi: 10.1161/JAHA.117.005696 (PMC5850139; doi:10.1161/jaha.117.005696), 2018-01-22
Supplement: JAH3-7-e005696-s001.pdf [file JAH3-7-e005696-s001.pdf]

# **SUPPLEMENTAL MATERIAL**

**Table S1.** Characteristics of Donor, DCM and HCM subject.

| Subject | Diagnosis | Age(years) | Sex    | LVEF (%) | LVEDd (mm) | IVSd (mm) |
|---------|-----------|------------|--------|----------|------------|-----------|
| 1       | Donor     | 49         | Male   | 64       | 46         | 8         |
| 2       | Donor     | 54         | Male   | 68       | 37         | 9         |
| 3       | Donor     | 32         | Male   | 70       | 44         | 7         |
| 4       | Donor     | 50         | Female | 67       | 45         | 7         |
| 5       | DCM       | 36         | Male   | 35       | 68         | 9         |
| 6       | DCM       | 55         | Male   | 24       | 65         | 10        |
| 7       | DCM       | 48         | Female | 32       | 70         | 10        |
| 8       | DCM       | 65         | Male   | 28       | 80         | 9         |
| 9       | HCM       | 30         | Male   | 65       | N/A        | 22        |
| 10      | HCM       | 42         | Male   | 55       | 40         | 27        |
| 11      | HCM       | 56         | Male   | 60       | N/A        | 25        |
| 12      | HCM       | 44         | Male   | 58       | 45         | 20        |

LVEF=left ventricular ejection fraction; LVEDd=left ventricular end-diastolic dimension; IVSd=interventricular septal thickness at diastole; DCM, dilated cardiomyopathy; HCM, hypertrophic cardiomyopathy; N/A, not available

**Table S2.** Echo data of ADAM22-TG and ADAM22-NTG mice with TAC or sham operation.

| Parameter | NTG Sham    | ADAM22 TG Sham | NTG TAC 4W   | ADAM22 TG TAC 4W |
|-----------|-------------|----------------|--------------|------------------|
| IVSD      | 0.66±0.022  | 0.66±0.032     | 0.77±0.031*  | 0.69±0.037#      |
| LVEDD     | 3.56±0.134  | 3.60±0.127     | 4.58±0.155*  | 3.91±0.164#      |
| LVPWd     | 0.66±0.033  | 0.65±0.034     | 0.75±0.042*  | 0.70±0.045#      |
| IVSS      | 1.03±0.040  | 1.03±0.047     | 1.21±0.065*  | 1.10±0.039#      |
| LVESD     | 1.91±0.112  | 1.90±0.076     | 3.21±0.106*  | 2.36±0.171#      |
| LVPWS     | 1.03±0.038  | 1.03±0.029     | 1.21±0.055*  | 1.08±0.054#      |
| EF        | 79.27±2.453 | 79.92±3.147    | 60.27±3.379* | 70.83±5.89#      |
| FS        | 46.3±3.552  | 47.5±1.730     | 29.45±2.114* | 39.5±2.611#      |

IVSD=left ventricular wall thickness at end diastole; LVEDD=left ventricular end-diastolic dimension; LVPWd=left ventricular posterior wall thickness at end diastole; IVSS=ventricular septum wall thickness at end systole; LVESD=left ventricular end-systolic dimension; LVPWS= left ventricular posterior wall thickness at end systole; EF=ejection fraction; FS=fractional shortening.

All values are presented as means ± SD. \* $P < 0.05$  vs ADAM22 NTG TAC/sham group; # $P < 0.05$  vs ADAM22 TG TAC/sham group.

**Table S3.** Echo data of ADAM22-CKO and ADAM22-Flox mice with TAC or sham operation.

| Parameter | $\alpha$ -MHC-MCM | ADAM22-Flox | ADAM22-CKO Sham | $\alpha$ -MHC-MCM | ADAM22-Flox  | ADAM22-CKO              |
|-----------|-------------------|-------------|-----------------|-------------------|--------------|-------------------------|
|           | Sham              | Sham        |                 | TAC 4W            | TAC 4W       | TAC 4W                  |
| IVSD      | 0.64±0.032        | 0.65±0.018  | 0.65±0.033      | 0.81±0.051*       | 0.79±0.032*  | 0.86±0.056 <sup>#</sup> |
| LVEDD     | 3.51±0.169        | 3.53±0.124  | 3.60±0.173      | 4.48±0.157*       | 4.52±0.145*  | 5.16±0.136 <sup>#</sup> |
| LVPWd     | 0.65±0.019        | 0.64±0.042  | 0.64±0.026      | 0.76±0.051*       | 0.75±0.041*  | 0.84±0.035 <sup>#</sup> |
| IVSS      | 1.03±0.027        | 1.01±0.036  | 1.00±0.039      | 1.21±0.042*       | 1.22±0.038*  | 1.27±0.026 <sup>#</sup> |
| LVESD     | 1.83±0.091        | 1.85±0.101  | 1.90±0.11       | 3.15±0.151*       | 3.16±0.103*  | 4.12±0.150 <sup>#</sup> |
| LVPWS     | 1.02±0.042        | 1.03±0.054  | 1.03±0.038      | 1.20±0.075*       | 1.23±0.048*  | 1.27±0.061 <sup>#</sup> |
| EF        | 81.5±3.605        | 80.2±3.215  | 80.1±3.458      | 62.33±4.01*       | 62±4.669*    | 46±4.123 <sup>#</sup>   |
| FS        | 47.75±1.337       | 47.33±2.309 | 46.73±2.68      | 29.5±2.431*       | 30.18±2.359* | 20.2±2.864 <sup>#</sup> |

IVSD=left ventricular wall thickness at end diastole; LVEDD=left ventricular end-diastolic dimension; LVPWd=left ventricular posterior wall thickness at end diastole; IVSS=ventricular septum wall thickness at end systole; LVESD=left ventricular end-systolic dimension; LVPWS= left ventricular posterior wall thickness at end systole; EF=ejection fraction; FS=fractional shortening. All values are presented as means ± SD.

\* $P$ <0.05 vs  $\alpha$ -MHC-MCM TAC/sham or ADAM22-Flox TAC/sham group; <sup>#</sup> $P$ <0.05 vs ADAM22-CKO TAC/sham group.

**Figure S1.** The expression of ADAM22 in cardiomyocytes.

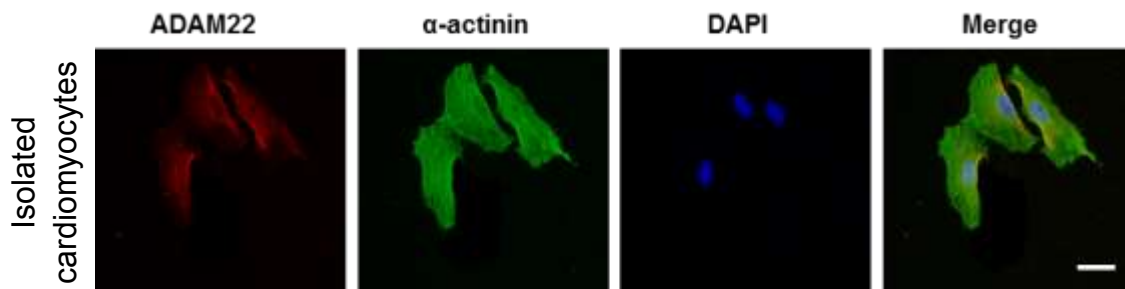

Immunofluorescence staining of ADAM22 on isolated cardiomyocytes labeled by specific marker  $\alpha$ -actinin. (scale bar = 20  $\mu$ m)

**Figure S2. The influence of ADAM22 on physiological cardiac hypertrophy.**

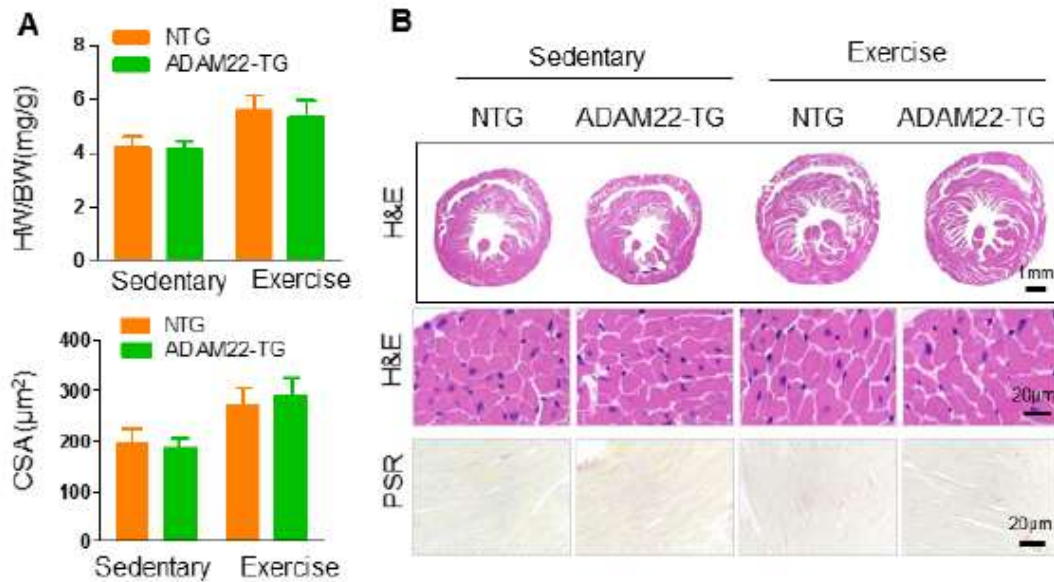

(A) The HW/BW ratios and analyses of the cardiac cross-sectional areas from ADAM22-TG and NTG mice under sedentary or exercise condition (n=7 mice in NTG group and n=12 mice in TG group were measured). (B) Histological analyses of whole heart stained with H&E (scale bar = 1 mm or 20  $\mu\text{m}$ ) and cardiac interstitial fibrosis after picrosirius red staining in the indicated groups. (scale bar = 20  $\mu\text{m}$ , n=7 mice in NTG group and n=12 mice in TG group were measured).

**Figure S3. Survival data in mice upon TAC.**

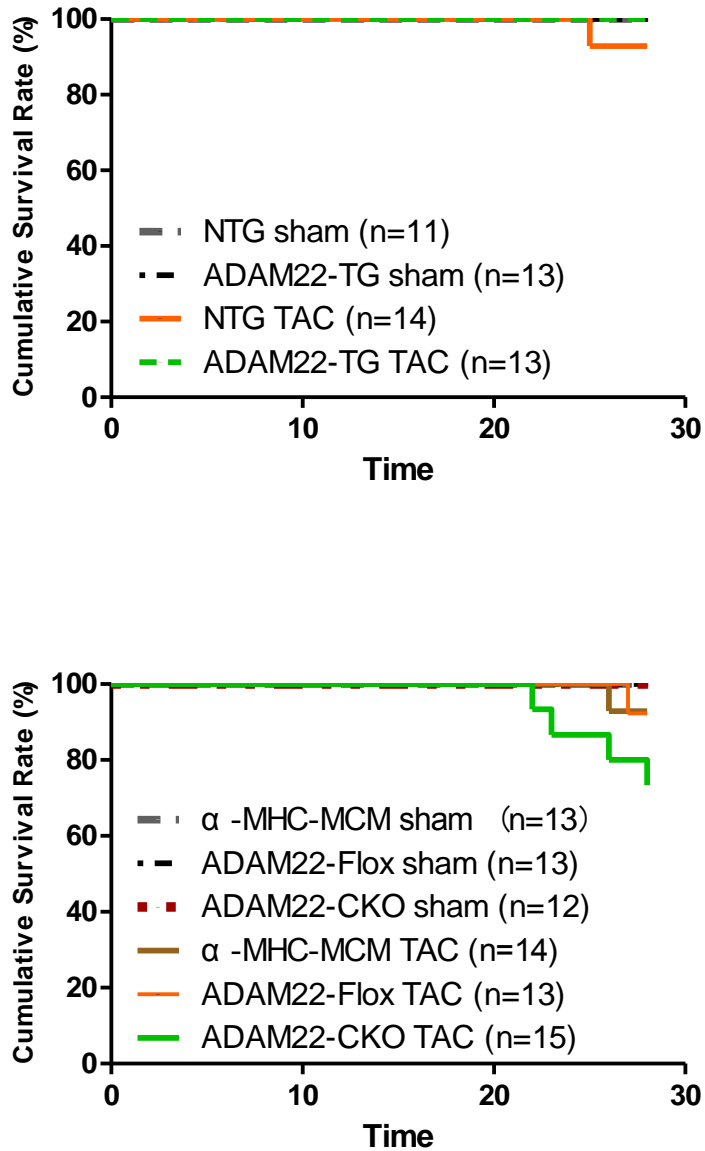

(A) Survival data of cardiac-specific conditional ADAM22 knockout,  $\alpha$ -MHC-MCM and ADAM22-Flox mice upon TAC and sham operation. (B) Survival data of cardiac-specific ADAM22 transgenic and control mice upon TAC and sham operation.

**Figure S4. The effect of tamoxifen injection on cardiac function of  $\alpha$ MHC-MerCreMer.**

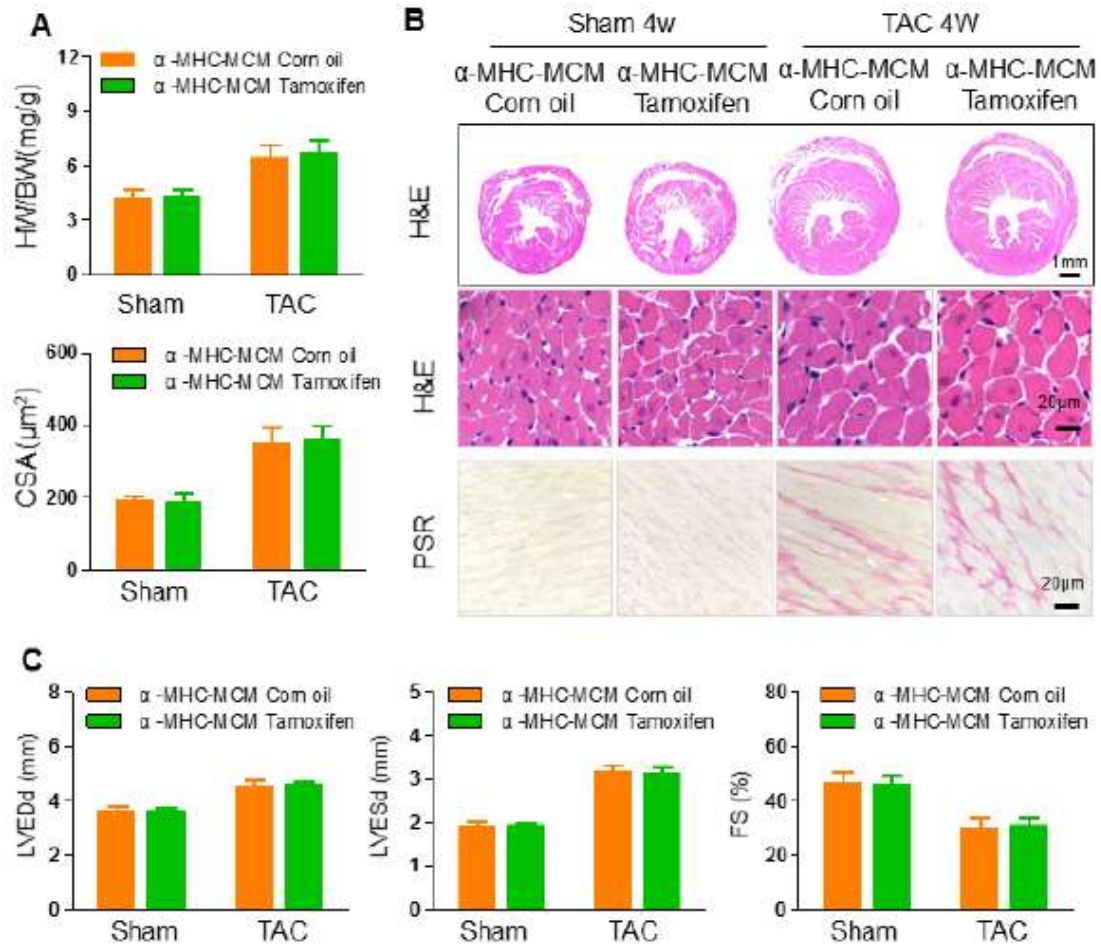

(A) The HW/BW ratios and analyses of the cardiac cross-sectional areas from  $\alpha$ -MHC-MCM mice injected corn oil or tamoxifen under TAC or sham operation (n=8 mice were measured per group). (B) Histological analyses of whole heart stained with H&E (scale bar = 1 mm or 20  $\mu\text{m}$ ) and cardiac interstitial fibrosis after picrosirius red staining in the indicated groups. (scale bar = 20  $\mu\text{m}$ , n=8 mice were measured per group). (C) The levels of LVEDd, LVESd and FS in the indicated groups (n=8 mice per group).



**Figure S5. Generation of cardiac-specific conditional ADAM22 knockout mice and identification.**

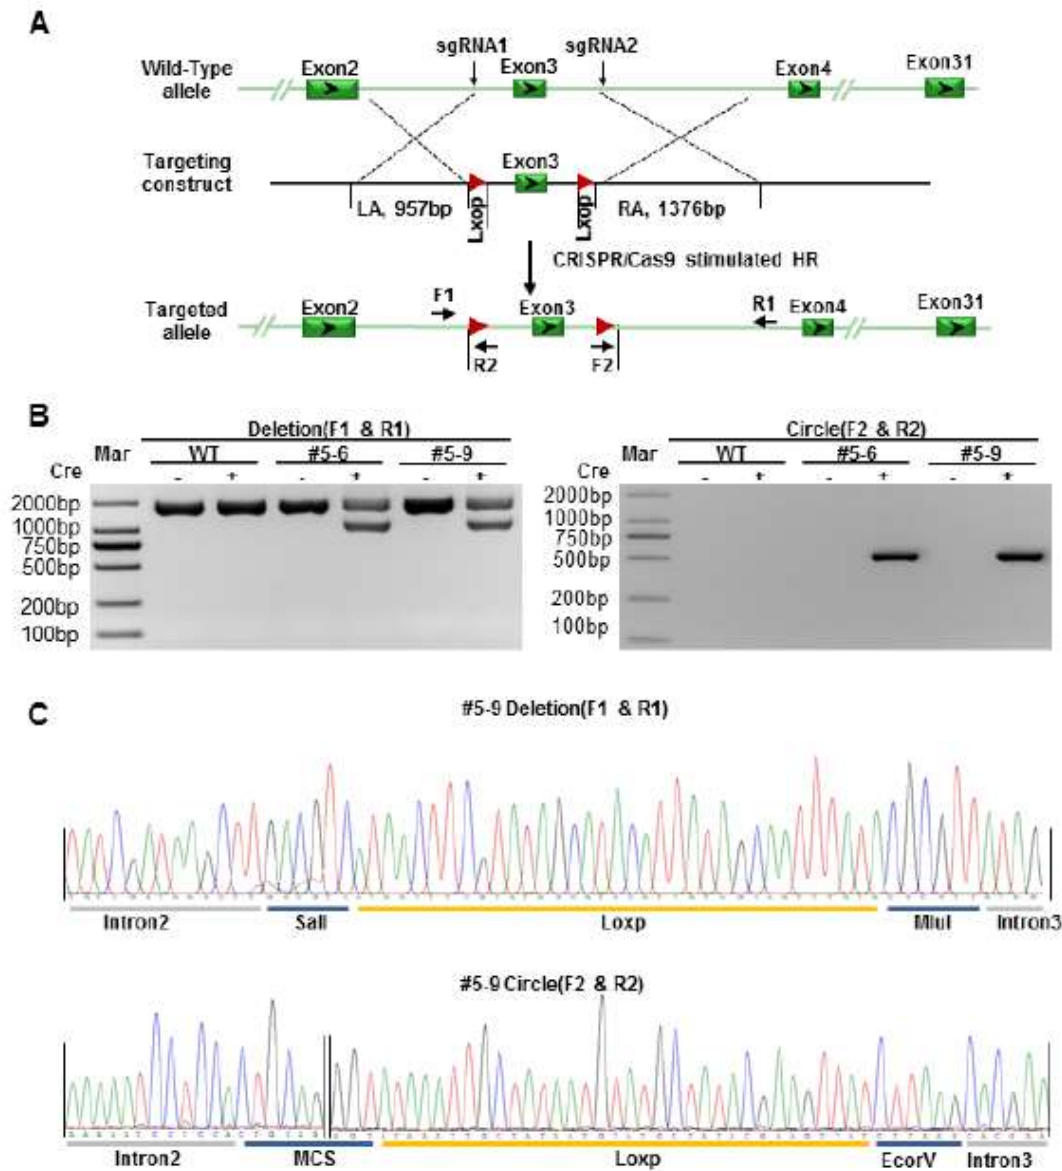

**(A)** Illustration of cardiac-specific conditional ADAM22 knockout mice. **(B)** Amplification of the entire region covering the floxed exon 1, exon 2, and homology arm using the F1/R1 primer (left) and the circle excised by Cre using the F2/R2 primer (right). **(C)** DNA sequence of the truncated fragment amplified by the F1/R1 primer (upper) and the circular PCR products amplified by the F2/R2 primer (below). Western blot analysis of ADAM22 expression in different tissues of ADAM22-CKO and WT mice (n=8 mice per group; \*P<0.05 vs. WT group).
